# Supplementary material for: An open-framework rutile-type magnesium isonicotinate and its structural analogue with an anatase topology
Source: Royal Society of Chemistry journal article supplement (doi:10.1039/c2dt31394d), 2012-11-07
Supplement: c2dt31394d.pdf [file c2dt31394d.pdf]

## **An open-framework magnesium isonicotinate with a rutile-type topology and its structural analogue**

Tingzhi Liu,<sup>†</sup> Daibing Luo,<sup>‡</sup> Dingguo Xu,<sup>†,\*</sup> Hongmei Zeng,<sup>†</sup> and Zhien Lin<sup>†,\*</sup>

<sup>†</sup> *College of Chemistry, Sichuan University, Chengdu 610064, People's Republic of  
China.*

<sup>‡</sup> *Analytical & Testing Center, Sichuan University, Chengdu 610064, People's Republic  
of China.*

\* To whom correspondence should be addressed. Tel: +86-28-85412284. E-mail:  
dgxu@scu.edu.cn (D. Xu), zhienlin@scu.edu.cn (Z. Lin)

**Figure captions:**

**Figure S1.** IR spectrum of compound **1**.

**Figure S2.** Experimental and simulated powder XRD patterns of compound **1** (Co K $\alpha$  radiation).

**Figure S3.** TGA curve of compound **1**.

**Figure S4.** IR spectrum of compound **2**.

**Figure S5.** Experimental and simulated powder XRD patterns of compound **2** (Co K $\alpha$  radiation).

**Figure S6.** Powder XRD patterns of compound **2** after heating at 450 °C for 1 h

**Figure S7.** TGA curve of compound **2**.

**Figure S8.** Hysteresis loop of electric polarization on a large single crystal of compound **1** at room temperature..

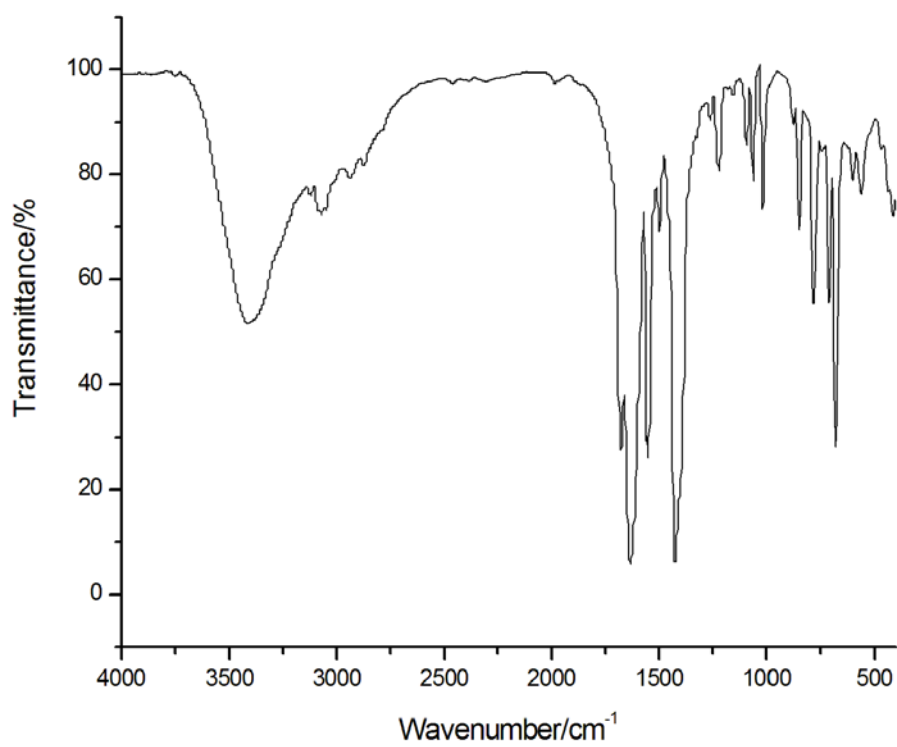

**Figure S1**

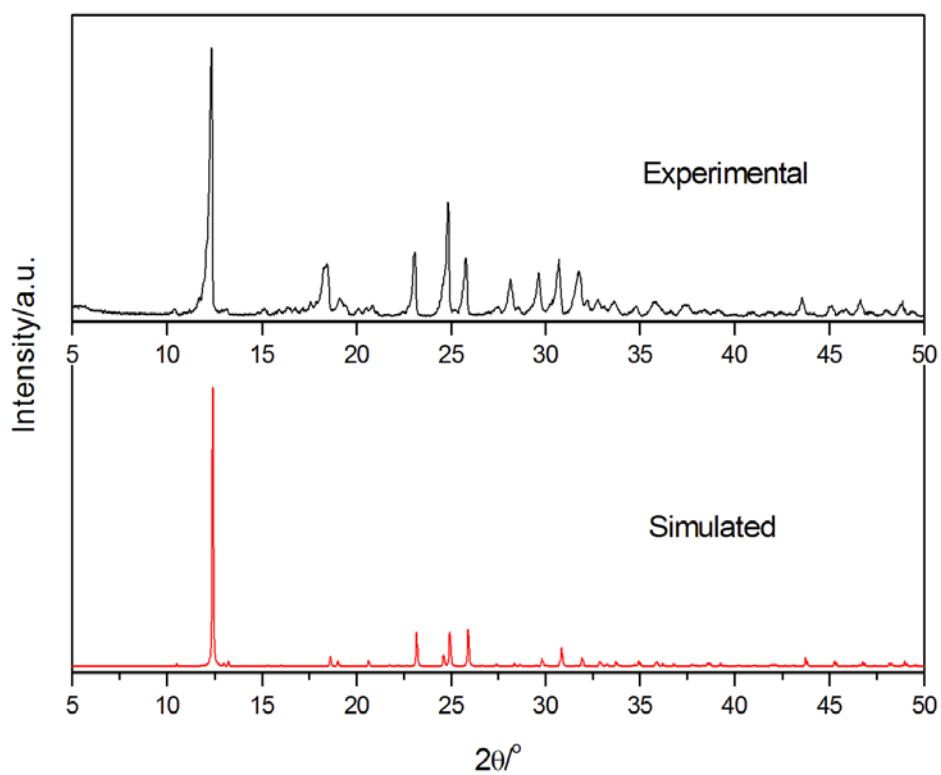

**Figure S2**

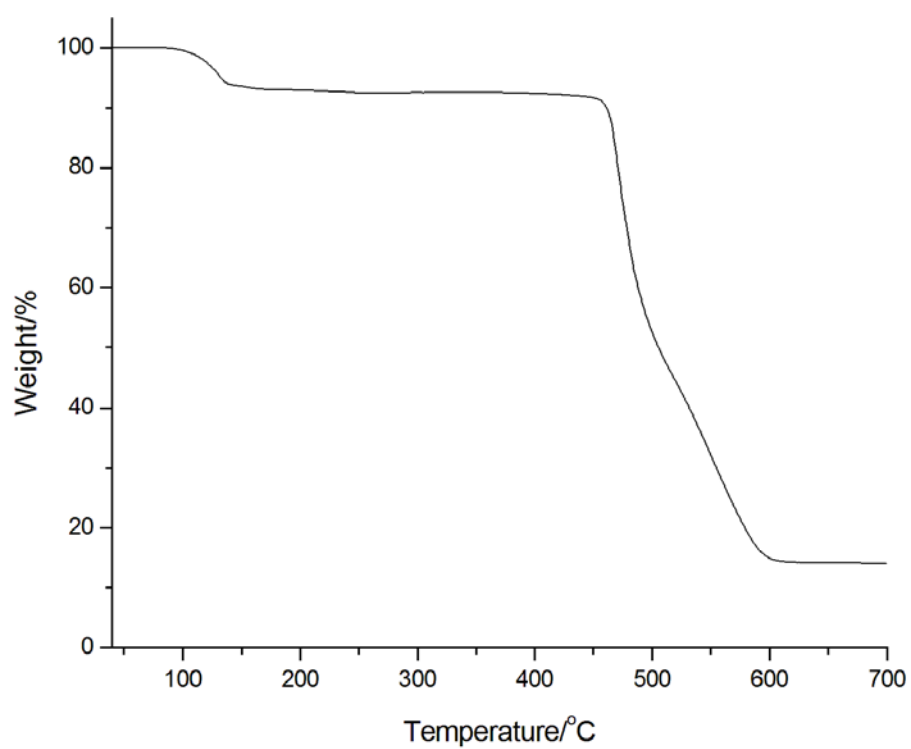

**Figure S3**

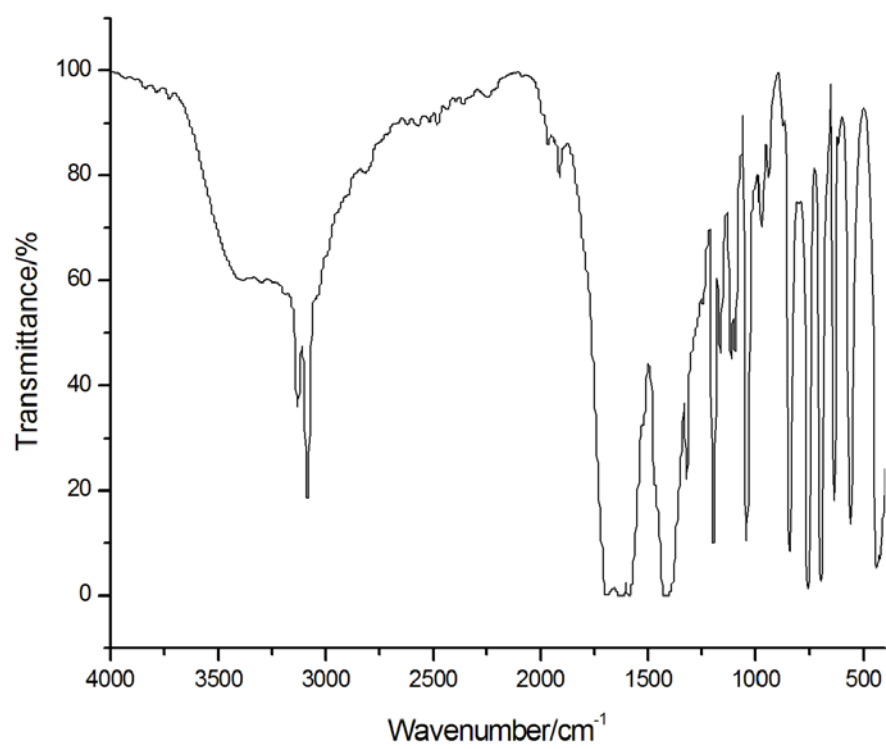

**Figure S4**

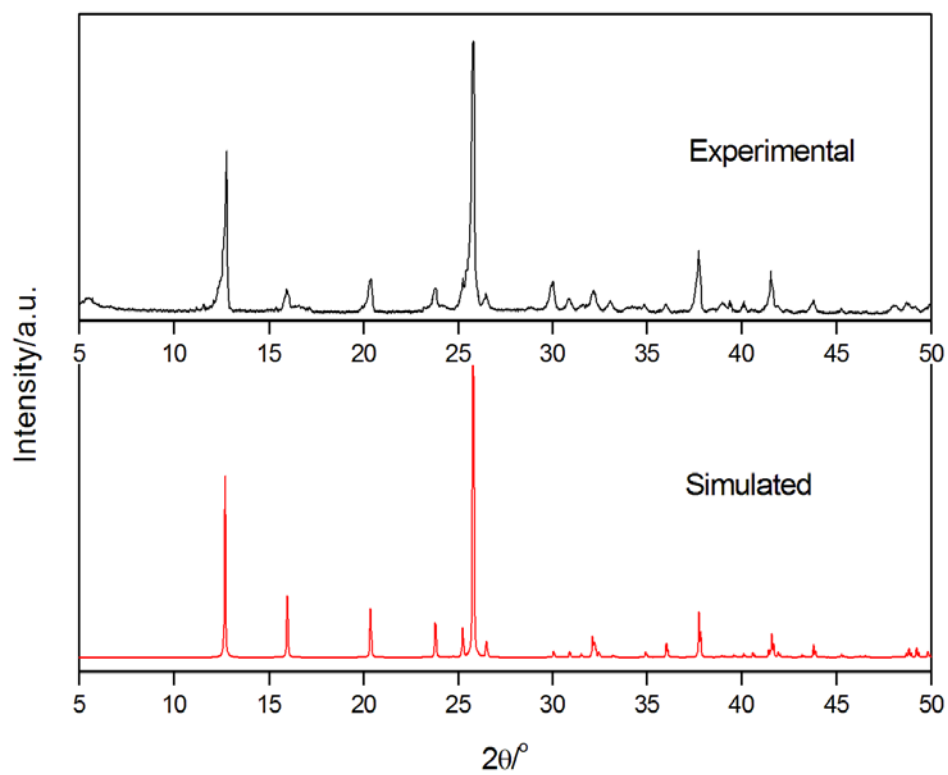

**Figure S5**

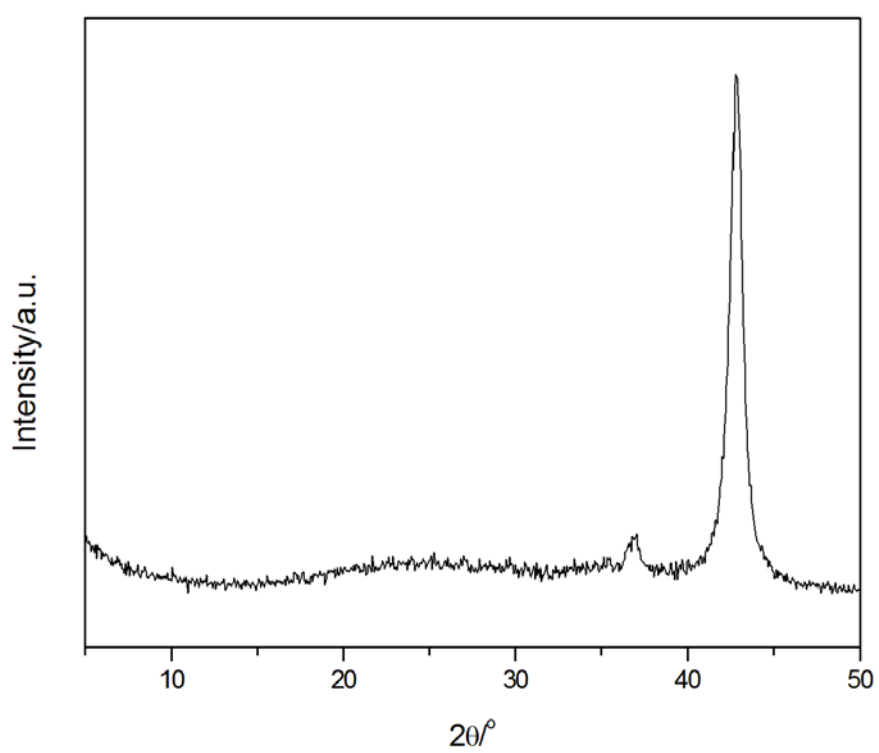

**Figure S6**



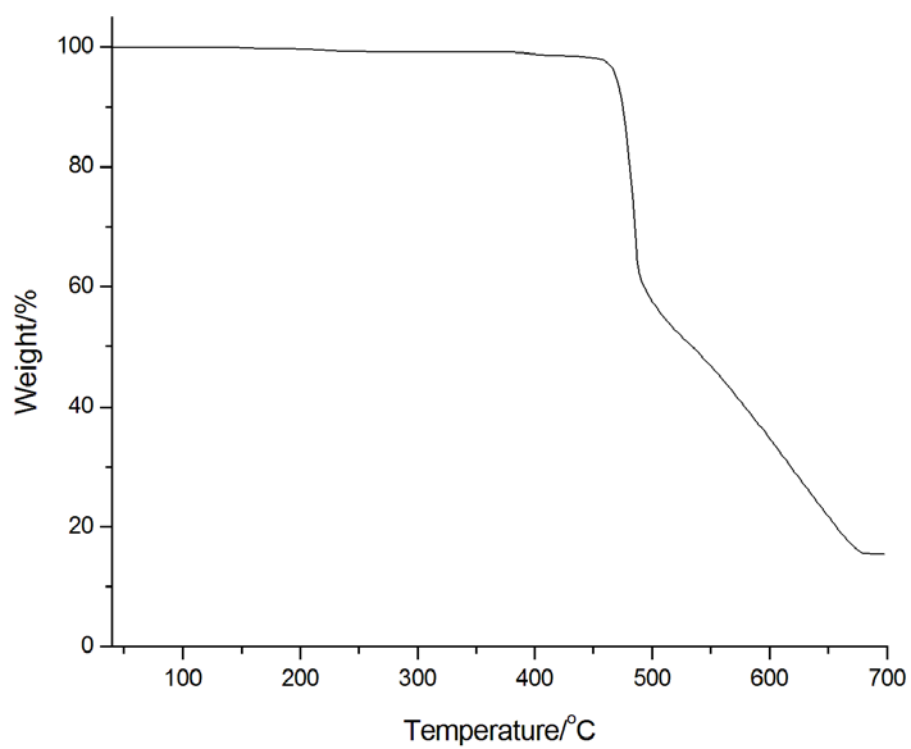

**Figure S7**

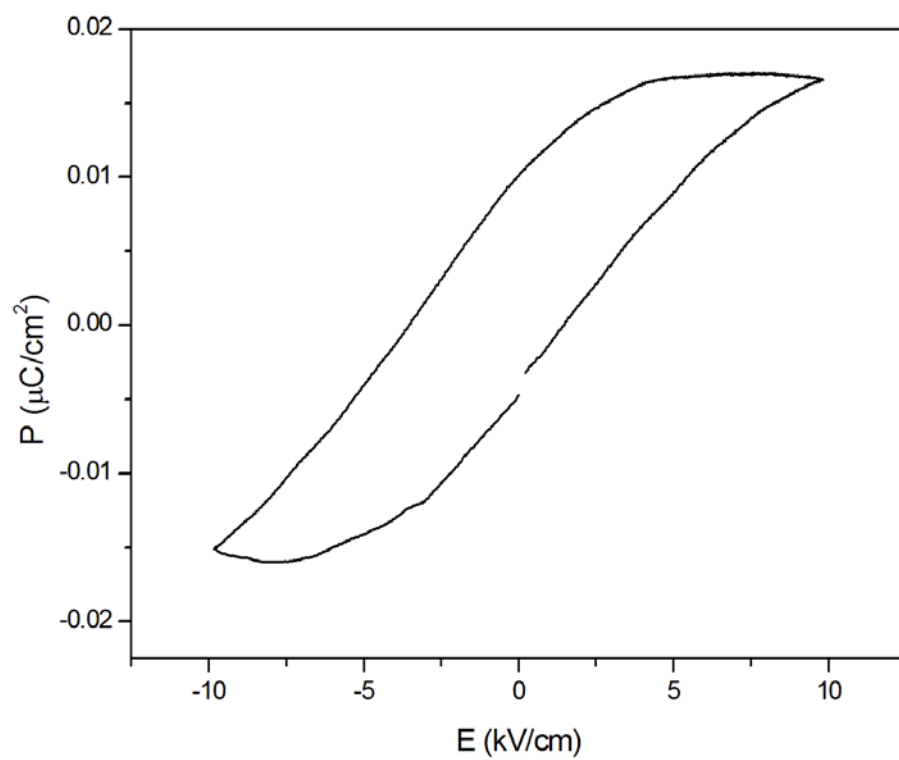

**Figure S8**
